# Supplementary material
Source: PubMed Central journal article supplement (PMC165084)

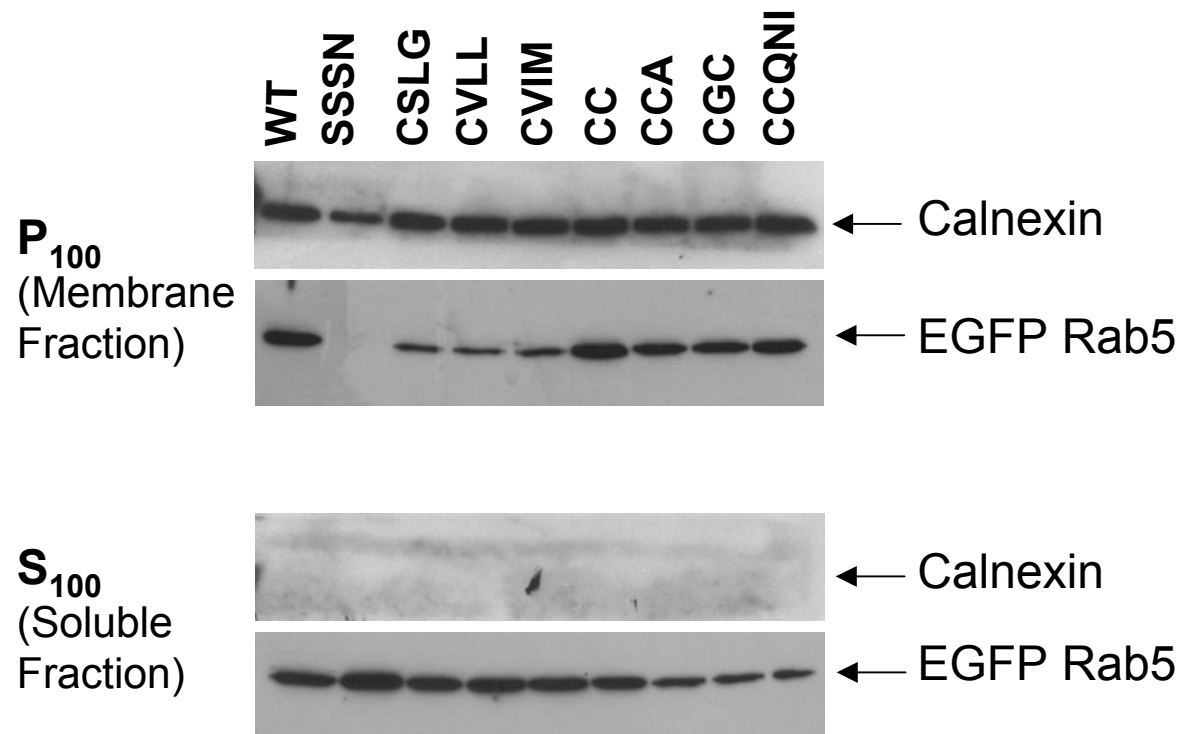

**Figure 1 suppl.**

Supplement: mbc_14_5_1882__1.pdf [file mbc_14_5_1882__1.pdf]

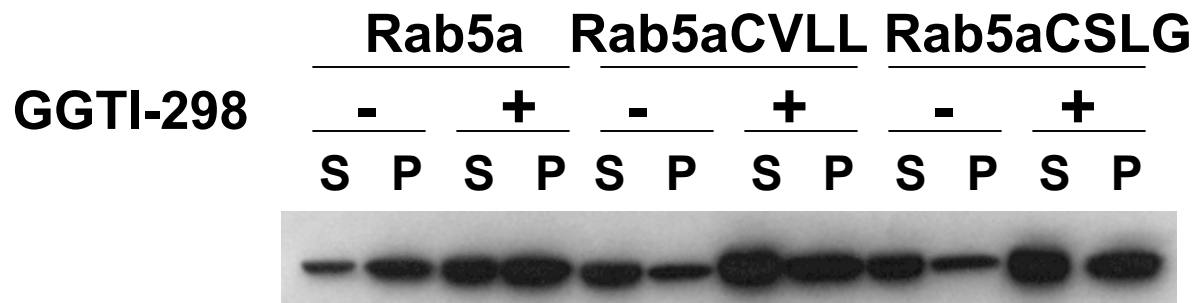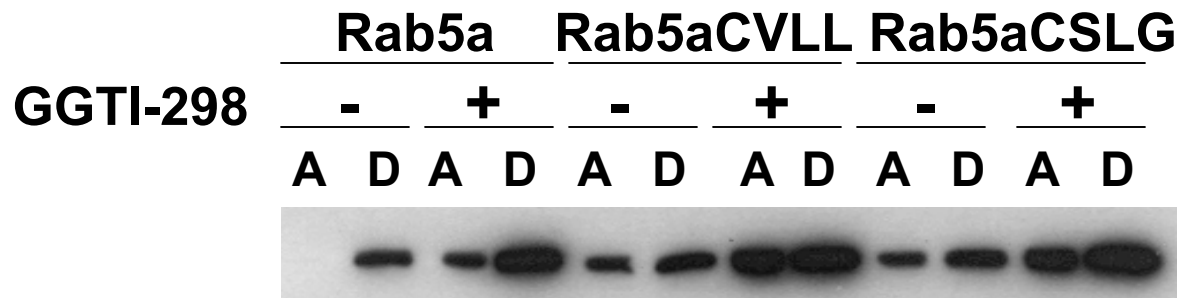

**Figure 2 suppl.**

Supplement: mbc_14_5_1882__2.pdf [file mbc_14_5_1882__2.pdf]

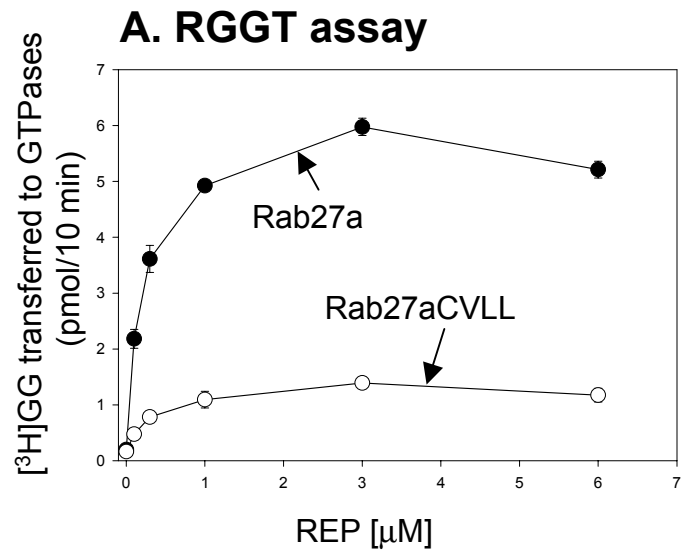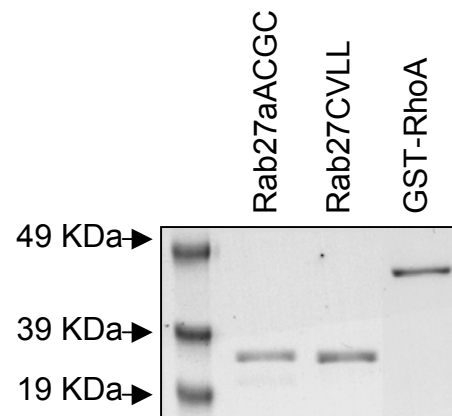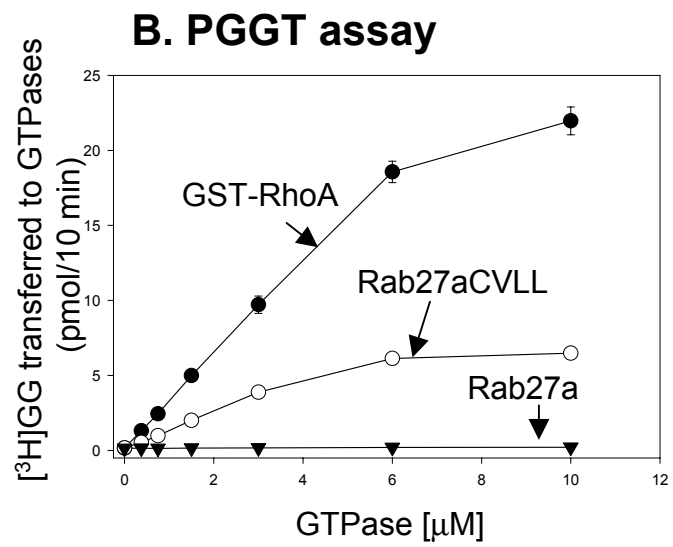

**Figure 3 suppl.**

Supplement: mbc_14_5_1882__3.pdf [file mbc_14_5_1882__3.pdf]
